# Supplementary material for: An Investigation on the Use of Au@SiO2@Au Nanomatryoshkas as Gap-Enhanced Raman Tags
Source: MDPI journal article supplement (doi:10.3390/nano13212893), 2023-11-01
Supplement: s1 [file s1]

AN INVESTIGATION ON THE USE OF  
AU@SiO<sub>2</sub>@Au NANOMATRYOSHKAS AS GAP  
ENHANCED RAMAN TAGS

SUPPORTING INFORMATION

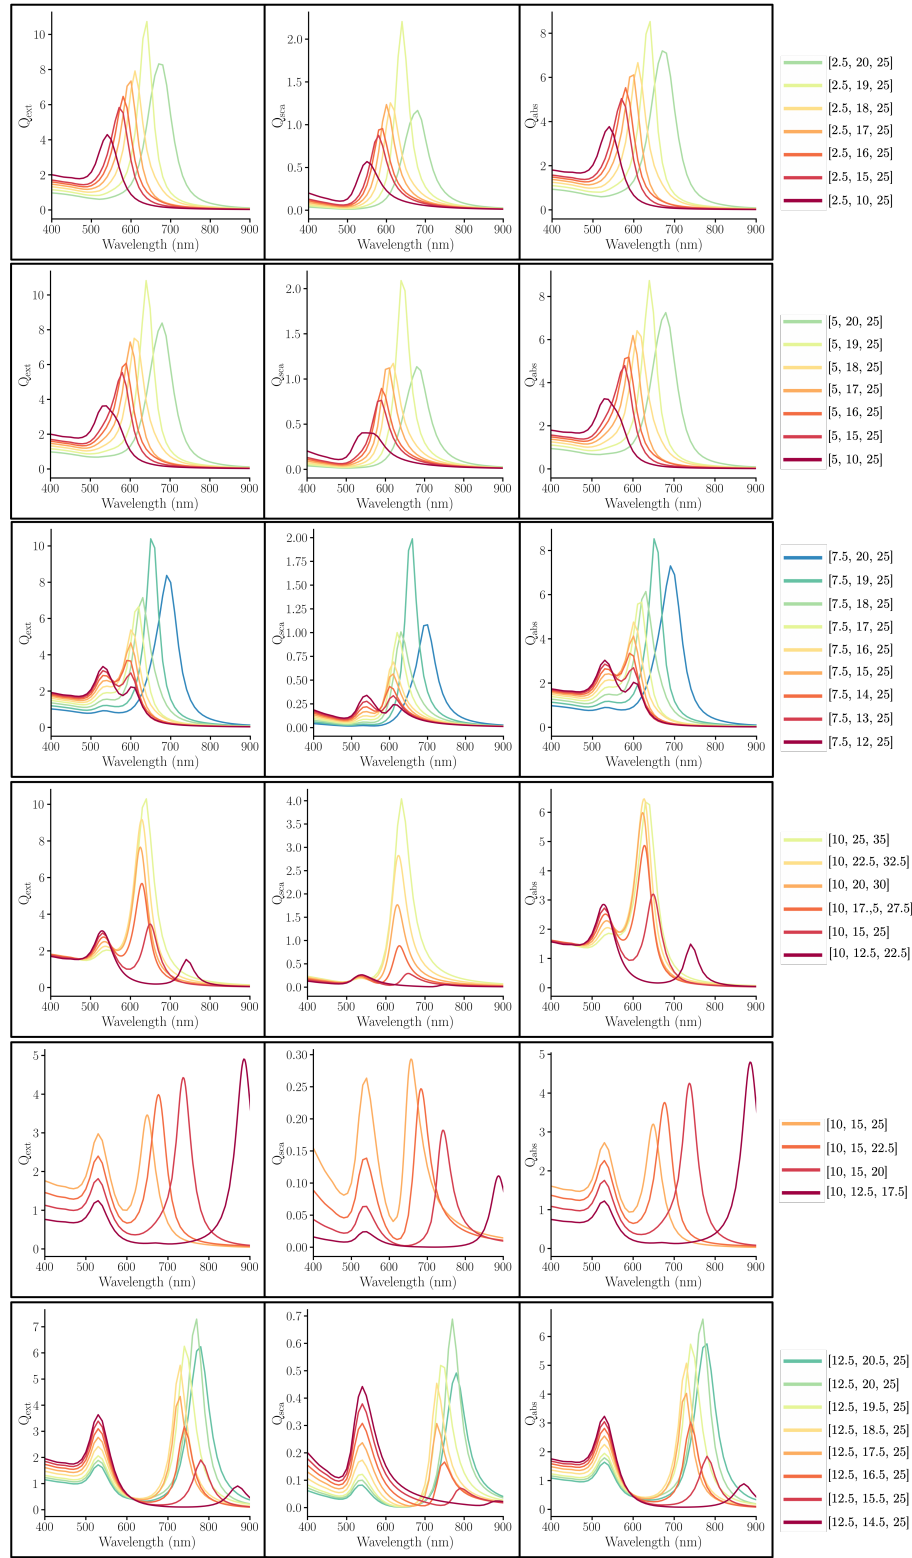

**Figure S1:**  $Q_{\text{ext}}$  (column 1),  $Q_{\text{sca}}$  (column 2), and  $Q_{\text{abs}}$  (column 3) spectra of nanomaterials with different geometries using the following notation:  $[r_1, r_2, r_3]$  where  $r_1$  is the radius of the Au core,  $r_2$  is the radius of the  $\text{SiO}_2$ -coated Au core, and  $r_3$  is the radius of the NM.

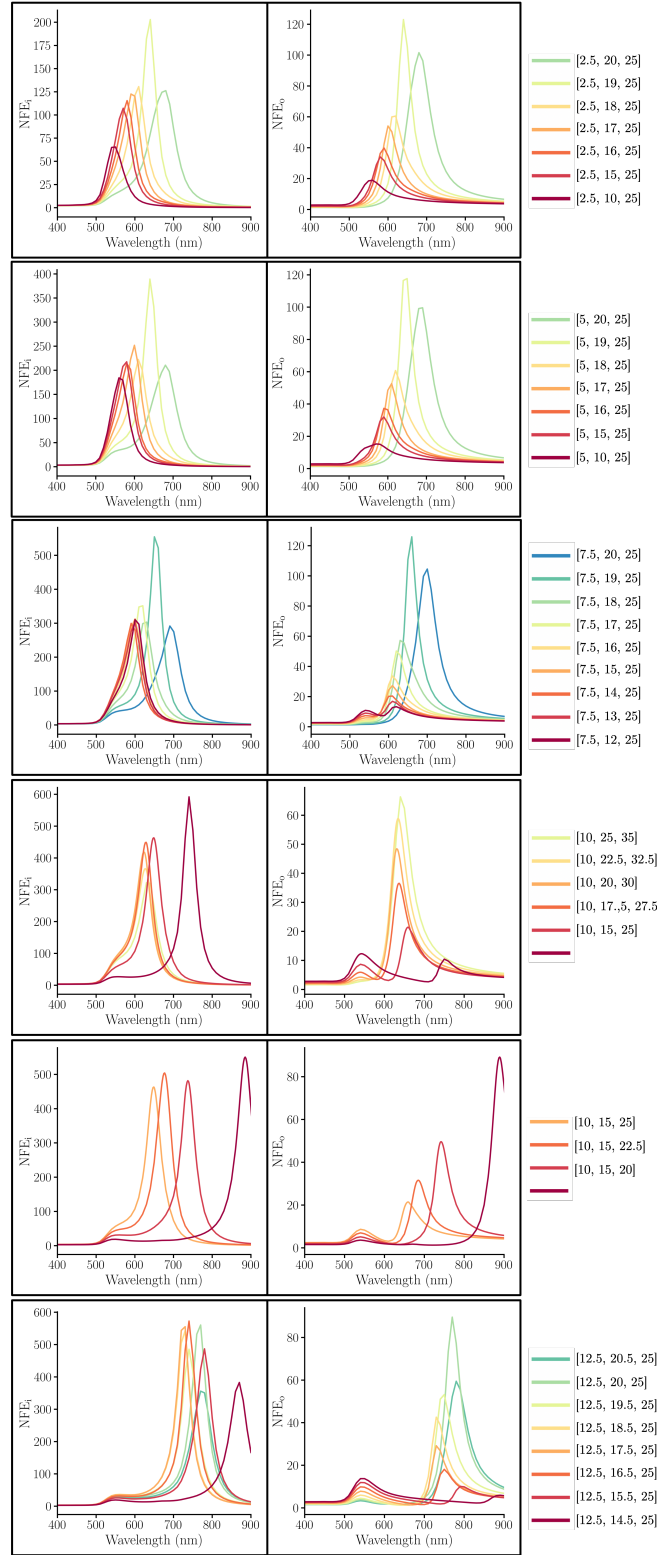

**Figure S2:**  $NFE_i$  (column 1) and  $NFE_o$  (column 2) spectra of nanomatryoshkas with different geometries using the following notation:  $[r_1, r_2, r_3]$  where  $r_1$  is the radius of the Au core,  $r_2$  is the radius of the  $SiO_2$ -coated Au core, and  $r_3$  is the radius of the NM.

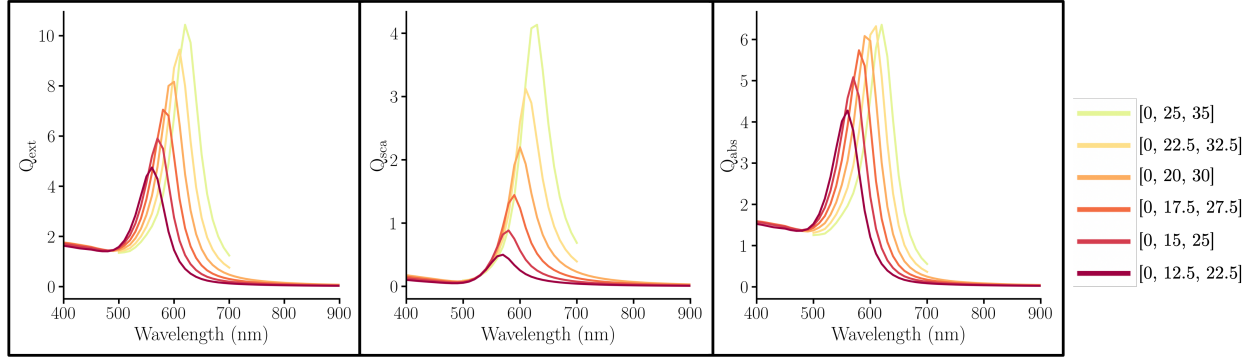

**Figure S3:**  $Q_{\text{ext}}$  (column 1),  $Q_{\text{sca}}$  (column 2), and  $Q_{\text{abs}}$  (column 3) spectra of nanoshells with different geometries using the following notation:  $[r_1, r_2, r_3]$  where  $r_1$  is the radius of the Au core (absent here),  $r_2$  is the radius of the  $\text{SiO}_2$ -coated Au core, and  $r_3$  is the radius of the NM.

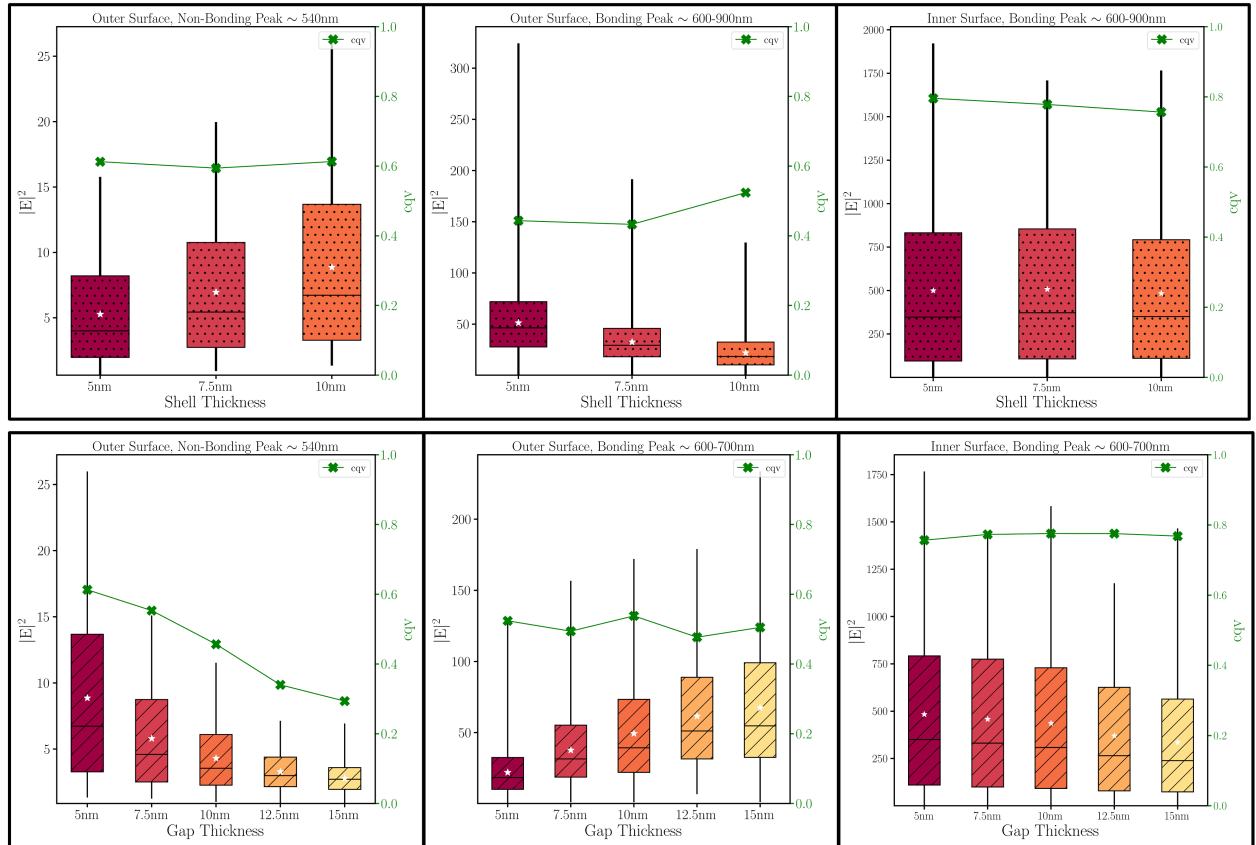

**Figure S4:** Box plots of the distribution of  $|E|^2$  intensities at 1nm above the surface of the shell for the changing gap series (first row) and the changing shell series (bottom row). White star represented the reported mean shown in NFE<sub>o</sub> calculations. Green cross and line between represent cqv and trend.



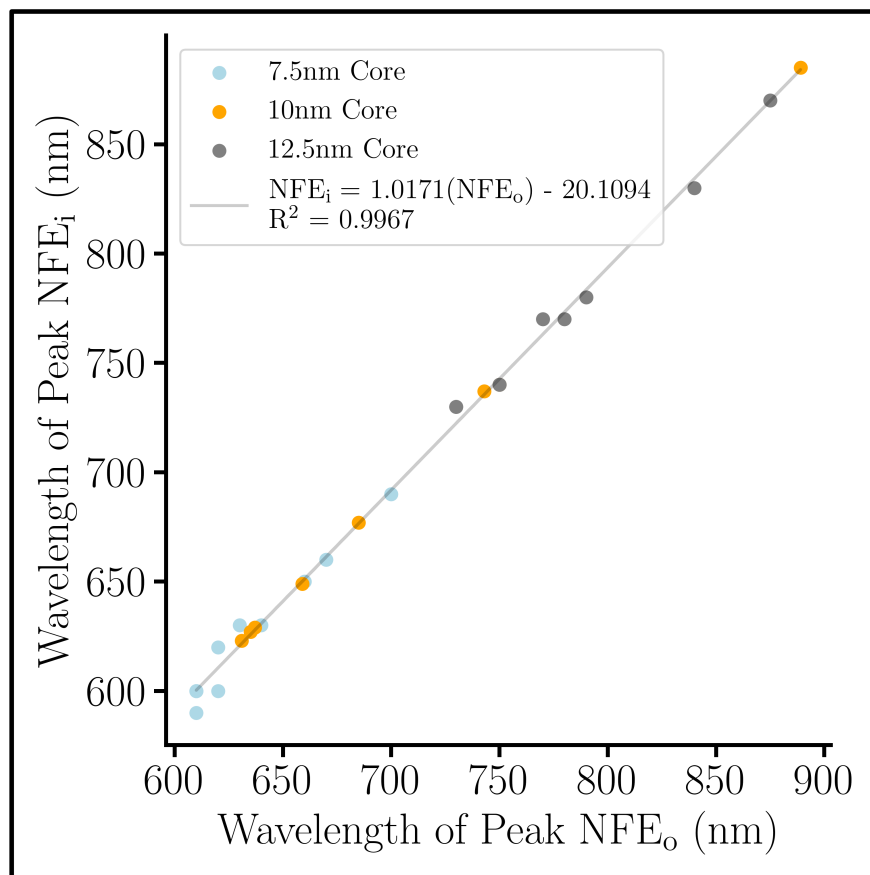

**Figure S5:** Correlation plot between NFE<sub>i</sub> and NFE<sub>o</sub> bonding peaks. For each color, a different series of systems were computed, each with a different radius for the core: 7.5nm (blue), 10nm (orange), and 12.5nm (grey). On average, the NFE<sub>o</sub> bonding peak is redshifted 8.2nm from the NFE<sub>i</sub> bonding peak.
